# Supplementary material for: Identification of gene signature for treatment response to guide precision oncology in clear-cell renal cell carcinoma
Source: PubMed Central journal article supplement (PMC7005147; doi:10.1038/s41598-020-58804-y), 2020-02-06
Supplement: 41598_2020_58804_MOESM1_ESM.pdf [file 41598_2020_58804_MOESM1_ESM.pdf]

## **Supplementary Data**

**Identification of gene signature for treatment response to guide precision oncology in clear-cell renal cell carcinoma.**

Ninadh M. D'Costa<sup>1,2</sup>, Davide Cina<sup>1</sup>, Raunak Shrestha<sup>1,2</sup>, Robert H Bell<sup>1,2</sup>, Yen-Yi Lin<sup>1,2</sup>, Hossein Asghari<sup>2,4</sup>, Cesar Monjaras-Avila<sup>2</sup>, Christian Kollmannsberger<sup>3</sup>, Faraz Hach<sup>1,2</sup>, Claudia Chavez-Munoz<sup>1,2</sup>, \*Alan I. So<sup>1,2</sup>.

### **Affiliations:**

<sup>1</sup>Department of Urologic Sciences, Faculty of Medicine, University of British Columbia, Vancouver, BC, Canada.

<sup>2</sup>Vancouver Prostate Centre, Vancouver, BC, Canada.

<sup>3</sup>BC Cancer Agency, Vancouver, BC, Canada

<sup>4</sup>School of Computing Science, Simon Fraser University, Burnaby, BC, Canada

### **\*Corresponding author:**

Dr. Alan I. So, M.D.

Associate Professor and Senior Research Scientist

Department of Urologic Sciences, Faculty of Medicine, University of British Columbia

Vancouver Prostate Centre, 2660 Oak St., Vancouver, V6H 3Z6, BC, Canada

Email: [dralanso@mail.ubc.ca](mailto:dralanso@mail.ubc.ca), Phone: 604-875-4818, Fax: 604-875-5654

**The authors declare no potential conflict of interests.**

# Content

1. **Supplementary Figure SF1:** Schematic diagram showing our study design.
2. **Supplementary Figure SF2:** Venn diagram showing the overlap in genes.
3. **Supplementary Figure SF3:** Kaplan-Meier plot of ccRCC patients with smaller gene panel.
4. **Supplementary Figure SF4:** Kaplan-Meier plot of the validation cohort of ccRCC patients.
5. **Supplementary Table ST1:** The top 500 ranked genes reported by featured selection technique.
6. **Supplementary Table ST2:** The genes selected for our 66-gene signature and their sources.
7. **Supplementary Table ST3:** Association of gene mutation with Immotion150 patient clusters.
8. **Supplementary Table ST4:** Association of gene mutation with 66-gene signature patient clusters.
9. **Supplementary Table ST5:** Patients classification pattern between the proposed 66-gene signature and IMmotion150 gene signature.
10. **Supplementary Table ST6:** Cox regression analysis of disease free survival time using the proposed 66-gene signature and IMmotion150 32-gene signature.

## Supplementary Figure SF1

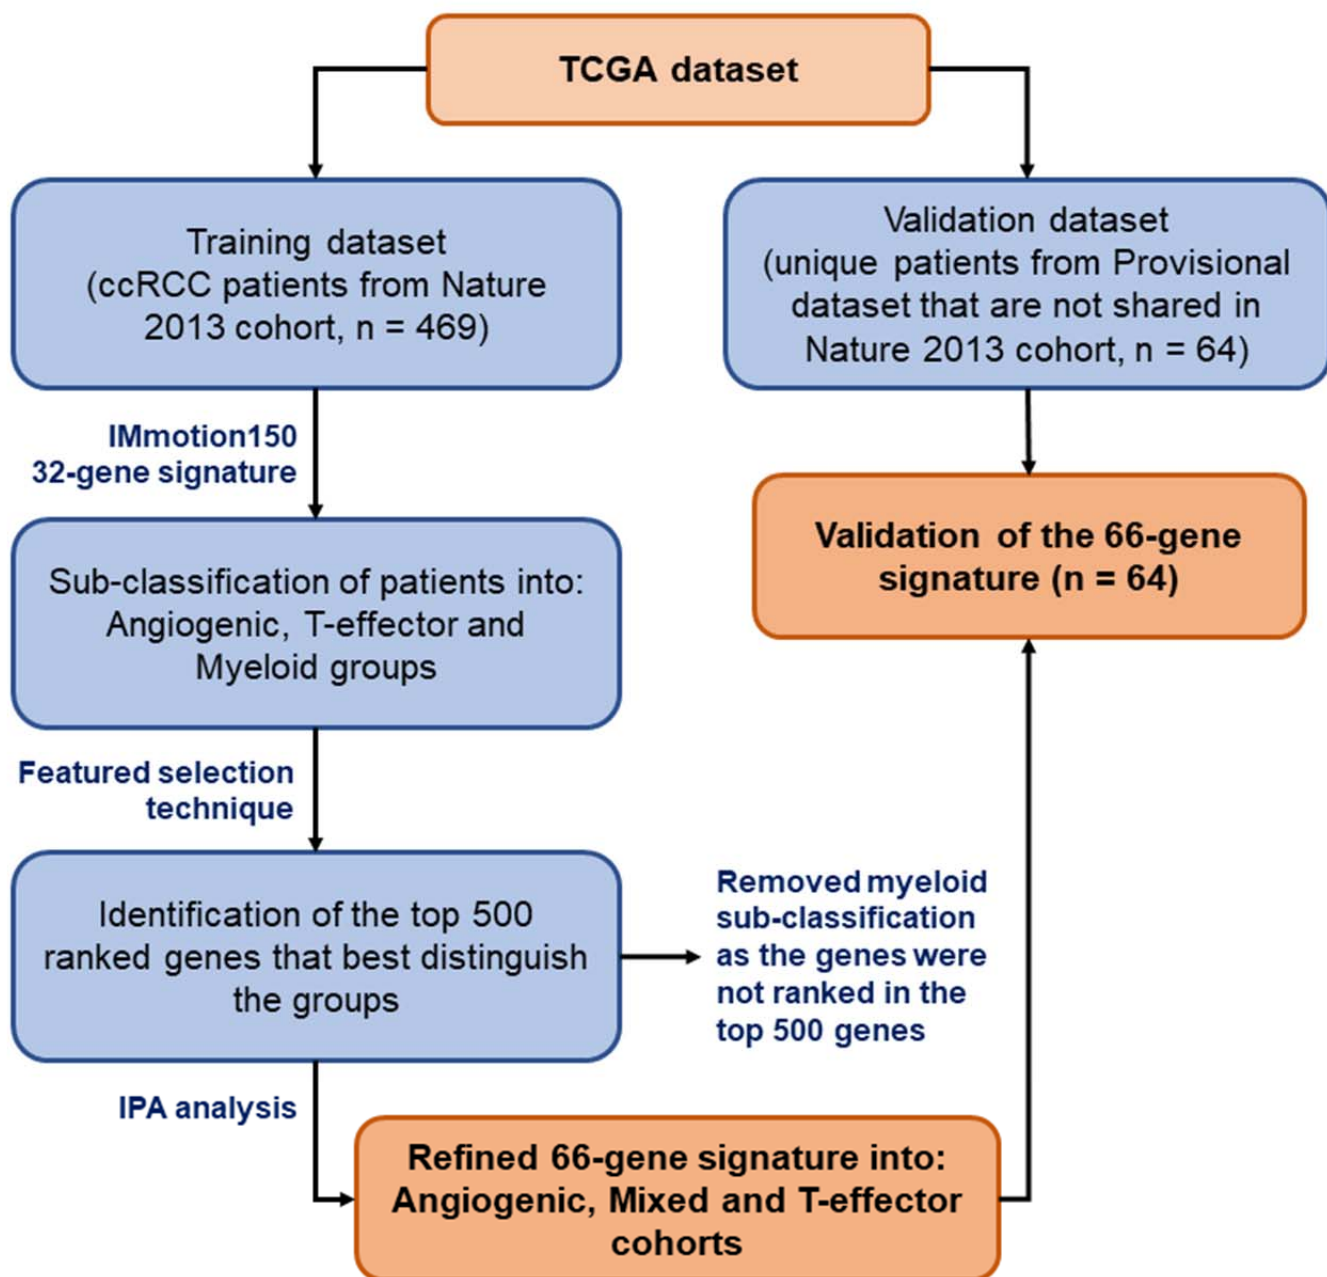

**Supplementary Figure SF1: Schematic diagram showing our study design.** A previously published 32-gene signature was used to sub-classify 469 ccRCC patients from TCGA. The global expression pattern of the sub-classified patients was analyzed to rank top 500 genes that distinguishes the clusters. IPA analysis on these 500 genes was used to select pathways involved in angiogenesis, cell migration and invasion, Ca<sup>2+</sup>-flux and T-effectors cells. Consequently, a gene signature of 66 genes was defined that improved clustering of ccRCC patients. A separate cohort of 64 ccRCC patients was used to validate our refined 66-gene signature.

## Supplementary Figure SF2

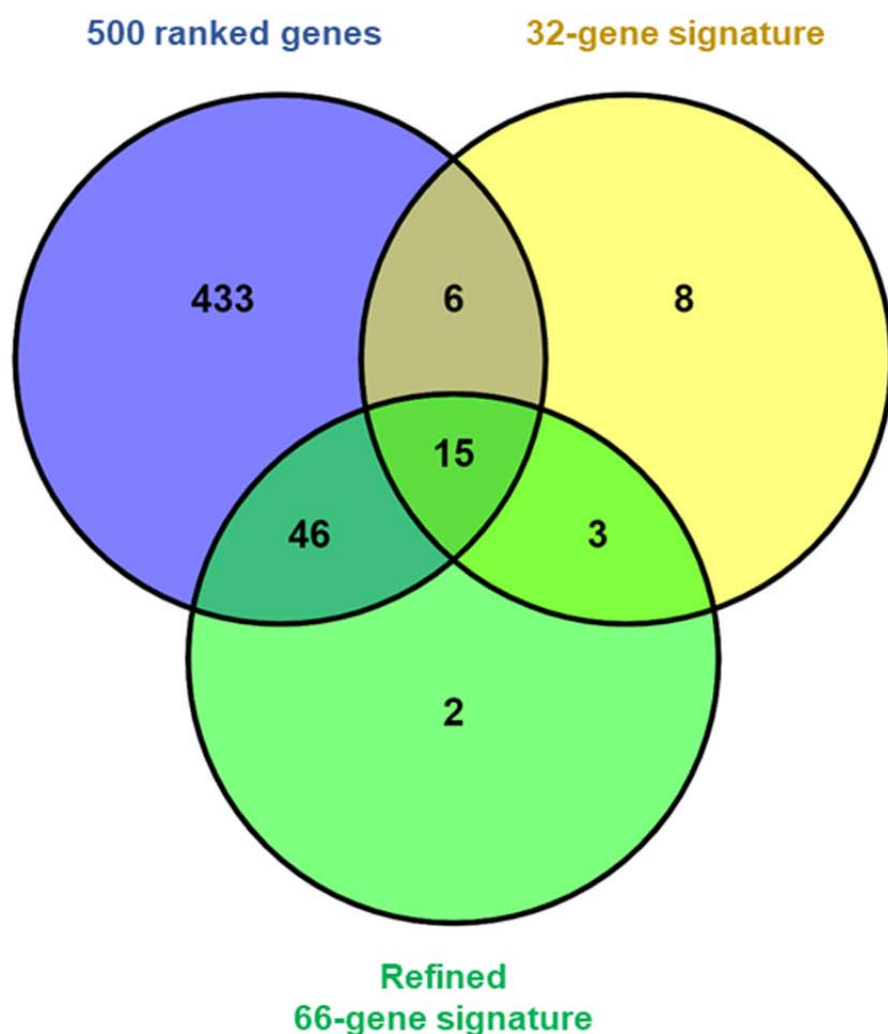

**Supplementary Figure SF2: Venn diagram showing the overlap in genes.** Featured selection technique based ranked 500 genes that best separated the patients into three different genotypes (angiogenic, T-effector and myeloid inflammation clusters) revealed 479 new genes (set blue only). Only 21 genes from IMmotion150 (intersection of set blue, yellow and green) matched with the 500 ranked genes. IPA analysis and relevant selection of Invasive and Ca<sup>2+</sup>-flux pathways of the 500 genes identified five associated new genes: 3 genes matched with IMmotion150 32-gene signature (intersection of set yellow and green only) and two entirely new genes (set green only). These analysis resulted in scrutinized selection of a 66-gene signature (set green).

## Supplementary Figure SF3

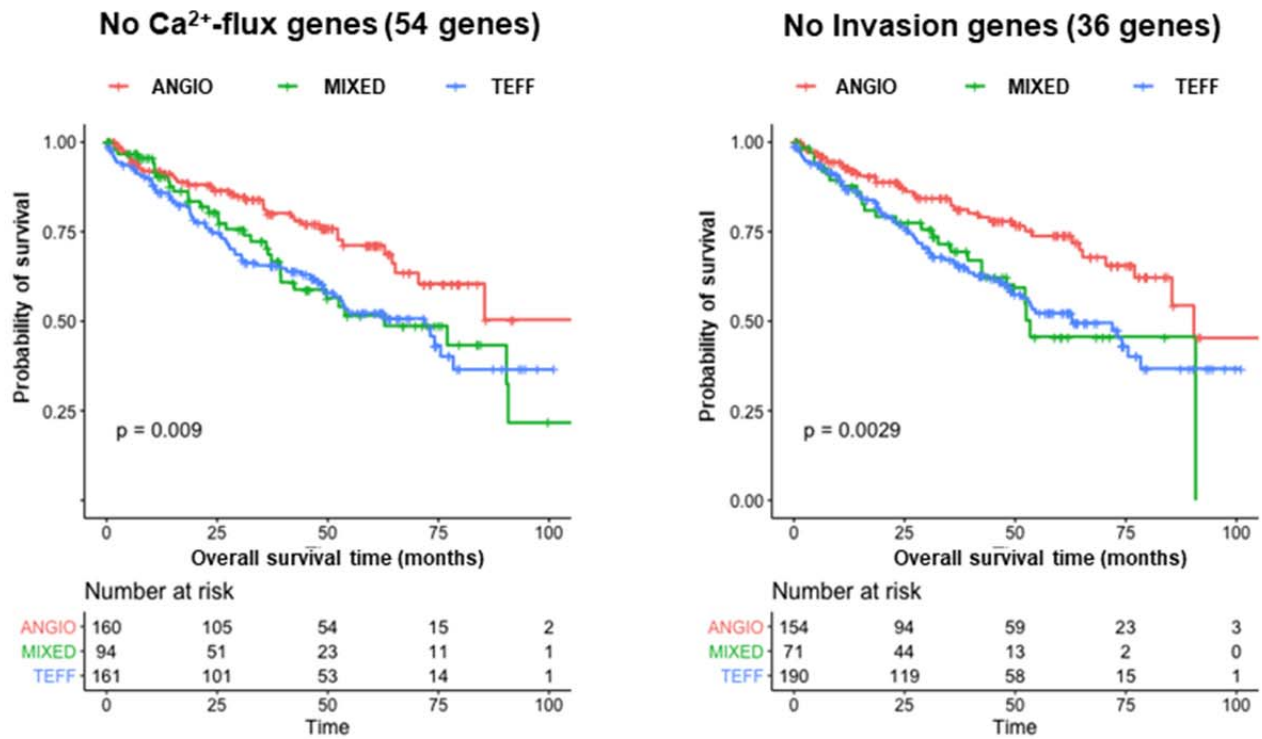

**Supplementary Figure SF3: Kaplan-Meier plot of ccRCC patients with smaller gene panel.** The proposed 66-gene signature is a comprehensive gene signature that significantly sub-classify ccRCC patients into angiogenic (ANGIO), T-effector (TEFF) and mixed (MIXED) clusters ( $p = 0.0008$ ). Although statistically significant, when the invasion or Ca<sup>2+</sup>-flux related genes are removed, the strength of the classification decreases ( $p = 0.009$  and  $p = 0.0029$ , respectively).

## Supplementary Figure SF4

a)

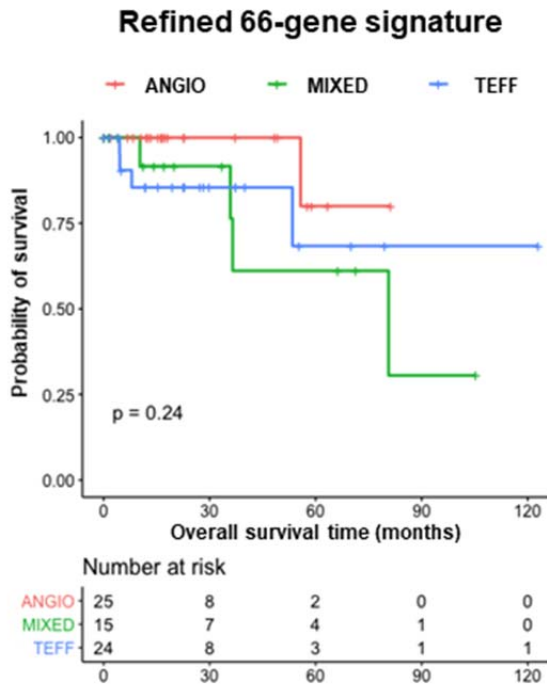

b)

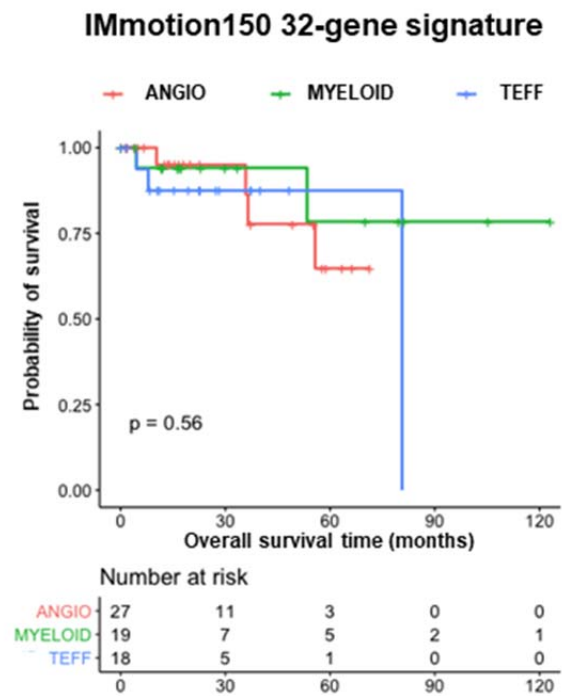

**Supplementary Figure SF4: Kaplan-Meier plot of the validation cohort of ccRCC patients.** A separate cohort of 64 ccRCC patients is used to validate the proposed 66-gene signature. a) With the refined 66-gene signature, a good separation of the groups is observed compared to b) IMmotion150 groups. Statistical significance is not achieved with either gene signature due to the small number of ccRCC patients in the validation cohort ( $n = 64$ ).

technique.

| Entrez Gene ID | HUGO Gene Symbol | Global Rank | Featured Weight |
|----------------|------------------|-------------|-----------------|
| 149628         | PYHIN1           | 1           | 0.0025          |
| 84174          | SLA2             | 2           | 0.00235         |
| 914            | CD2              | 3           | 0.00233         |
| 4049           | LTA              | 4           | 0.00222         |
| 925            | CD8A             | 5           | 0.00212         |
| 55423          | SIRPG            | 6           | 0.00209         |
| 152789         | JAKMIP1          | 7           | 0.00207         |
| 201633         | TIGIT            | 8           | 0.00206         |
| 3932           | LCK              | 9           | 0.00203         |
| 916            | CD3E             | 10          | 0.00202         |
| 4753           | NELL2            | 11          | 0.00202         |
| 939            | CD27             | 12          | 0.00201         |
| 926            | CD8B             | 13          | 0.002           |
| 128611         | ZNF831           | 14          | 0.00184         |
| 27334          | P2RY10           | 15          | 0.00182         |
| 5778           | PTPN7            | 16          | 0.00181         |
| 3003           | GZMK             | 17          | 0.00181         |
| 947            | CD34             | 18          | 0.0018          |
| 9079           | LDB2             | 19          | 0.00178         |
| 29851          | ICOS             | 20          | 0.00171         |
| 4068           | SH2D1A           | 21          | 0.0017          |
| 51294          | PCDH12           | 22          | 0.00167         |
| 3643           | INSR             | 23          | 0.00167         |
| 2078           | ERG              | 24          | 0.00162         |
| 641700         | ECSCR            | 25          | 0.00162         |
| 5698           | PSMB9            | 26          | 0.00158         |
| 155038         | GIMAP8           | 27          | 0.00157         |
| 6890           | TAP1             | 28          | 0.00155         |
| 1234           | CCR5             | 29          | 0.00155         |
| 2833           | CXCR3            | 30          | 0.00154         |
| 3659           | IRF1             | 31          | 0.00154         |
| 9760           | TOX              | 32          | 0.00153         |
| 114836         | SLAMF6           | 33          | 0.00153         |
| 9051           | PSTPIP1          | 34          | 0.00153         |
| 2034           | EPAS1            | 35          | 0.00151         |
| 3702           | ITK              | 36          | 0.00151         |
| 3594           | IL12RB1          | 37          | 0.00149         |
| 53347          | UBASH3A          | 38          | 0.00148         |
| 115362         | GBP5             | 39          | 0.00148         |
| 356            | FASLG            | 40          | 0.00147         |
| 23177          | CEP68            | 41          | 0.00143         |
| 1003           | CDH5             | 42          | 0.00142         |

| Entrez Gene ID | HUGO Gene Symbol | Global Rank | Featured Weight |
|----------------|------------------|-------------|-----------------|
| 3561           | IL2RG            | 43          | 0.00141         |
| 9047           | SH2D2A           | 44          | 0.0014          |
| 3604           | TNFRSF9          | 45          | 0.00139         |
| 9744           | ACAP1            | 46          | 0.00138         |
| 6397           | SEC14L1          | 47          | 0.00137         |
| 56253          | CRTAM            | 48          | 0.00136         |
| 374403         | TBC1D10C         | 49          | 0.00135         |
| 8530           | CST7             | 50          | 0.00134         |
| 919            | CD247            | 51          | 0.00134         |
| 7075           | TIE1             | 52          | 0.00133         |
| 64123          | ELTD1            | 53          | 0.00131         |
| 11151          | CORO1A           | 54          | 0.0013          |
| 80177          | MYCT1            | 55          | 0.0013          |
| 6398           | SECTM1           | 56          | 0.00129         |
| 22914          | KLRK1            | 57          | 0.00128         |
| 79037          | PVRIG            | 58          | 0.00128         |
| 9402           | GRAP2            | 59          | 0.00128         |
| 917            | CD3G             | 60          | 0.00127         |
| 2534           | FYN              | 61          | 0.00126         |
| 90952          | ESAM             | 62          | 0.00123         |
| 116071         | BATF2            | 63          | 0.00123         |
| 3683           | ITGAL            | 64          | 0.00123         |
| 1731           | SEPT1            | 65          | 0.00122         |
| 154075         | SAMD3            | 66          | 0.00122         |
| 3902           | LAG3             | 67          | 0.00121         |
| 3112           | HLA-DOB          | 68          | 0.00121         |
| 2113           | ETS1             | 69          | 0.00121         |
| 7454           | WAS              | 70          | 0.00121         |
| 5133           | PDCD1            | 71          | 0.0012          |
| 4818           | NKG7             | 72          | 0.00119         |
| 1E+08          | LRRC70           | 73          | 0.00118         |
| 11184          | MAP4K1           | 74          | 0.00115         |
| 2321           | FLT1             | 75          | 0.00114         |
| 54873          | PALMD            | 76          | 0.00113         |
| 3108           | HLA-DMA          | 77          | 0.00113         |
| 4283           | CXCL9            | 78          | 0.00112         |
| 401124         | DTHD1            | 79          | 0.00111         |
| 2672           | GFI1             | 80          | 0.00111         |
| 10225          | CD96             | 81          | 0.00111         |
| 29116          | MYLIP            | 82          | 0.00111         |
| 164118         | TTC24            | 83          | 0.00111         |
| 3134           | HLA-F            | 84          | 0.00108         |

| Entrez Gene ID | HUGO Gene Symbol | Global Rank | Featured Weight |
|----------------|------------------|-------------|-----------------|
| 6352           | CCL5             | 85          | 0.00108         |
| 84636          | GPR174           | 86          | 0.00108         |
| 3001           | GZMA             | 87          | 0.00108         |
| 2324           | FLT4             | 88          | 0.00106         |
| 1012           | CDH13            | 89          | 0.00106         |
| 50852          | TRAT1            | 90          | 0.00106         |
| 972            | CD74             | 91          | 0.00105         |
| 3111           | HLA-DOA          | 92          | 0.00105         |
| 54440          | SASH3            | 93          | 0.00104         |
| 25992          | SNED1            | 94          | 0.00104         |
| 27240          | SIT1             | 95          | 0.00104         |
| 6925           | TCF4             | 96          | 0.00104         |
| 952            | CD38             | 97          | 0.00103         |
| 6489           | ST8SIA1          | 98          | 0.00103         |
| 5790           | PTPRCAP          | 99          | 0.00103         |
| 124460         | SNX20            | 100         | 0.00103         |
| 7450           | VWF              | 101         | 0.00103         |
| 8320           | EOMES            | 102         | 0.00103         |
| 1844           | DUSP2            | 103         | 0.00101         |
| 2828           | GPR4             | 104         | 0.00101         |
| 2841           | GPR18            | 105         | 0.00101         |
| 80310          | PDGFD            | 106         | 0.00101         |
| 5138           | PDE2A            | 107         | 0.00101         |
| 1493           | CTLA4            | 108         | 0.00101         |
| 115361         | GBP4             | 109         | 0.001           |
| 5788           | PTPRC            | 110         | 0.001           |
| 54538          | ROBO4            | 111         | 0.00099         |
| 2633           | GBP1             | 112         | 0.00099         |
| 5287           | PIK3C2B          | 113         | 0.00098         |
| 6891           | TAP2             | 114         | 0.00098         |
| 10252          | SPRY1            | 115         | 0.00097         |
| 9495           | AKAP5            | 116         | 0.00097         |
| 5175           | PECAM1           | 117         | 0.00096         |
| 116835         | HSPA12B          | 118         | 0.00096         |
| 79812          | MMRN2            | 119         | 0.00094         |
| 441168         | FAM26F           | 120         | 0.00094         |
| 7453           | WARS             | 121         | 0.00094         |
| 22899          | ARHGEF15         | 122         | 0.00093         |
| 6693           | SPN              | 123         | 0.00093         |
| 7078           | TIMP3            | 124         | 0.00092         |
| 6196           | RPS6KA2          | 125         | 0.00092         |
| 4855           | NOTCH4           | 126         | 0.00092         |
| 94             | ACVRL1           | 127         | 0.00091         |

| Entrez Gene ID | HUGO Gene Symbol | Global Rank | Featured Weight |
|----------------|------------------|-------------|-----------------|
| 116159         | CYYR1            | 128         | 0.00091         |
| 3458           | IFNG             | 129         | 0.0009          |
| 170575         | GIMAP1           | 130         | 0.00089         |
| 64411          | ARAP3            | 131         | 0.00089         |
| 161198         | CLEC14A          | 132         | 0.00089         |
| 3560           | IL2RB            | 133         | 0.00089         |
| 83593          | RASSF5           | 134         | 0.00088         |
| 51267          | CLEC1A           | 135         | 0.00088         |
| 132332         | TMEM155          | 136         | 0.00087         |
| 1901           | S1PR1            | 137         | 0.00087         |
| 182            | JAG1             | 138         | 0.00087         |
| 6373           | CXCL11           | 139         | 0.00086         |
| 51513          | ETV7             | 140         | 0.00086         |
| 83483          | PLVAP            | 141         | 0.00085         |
| 63940          | GPSM3            | 142         | 0.00085         |
| 399            | RHOH             | 143         | 0.00084         |
| 6375           | XCL1             | 144         | 0.00084         |
| 57572          | DOCK6            | 145         | 0.00083         |
| 3791           | KDR              | 146         | 0.00083         |
| 57823          | SLAMF7           | 147         | 0.00083         |
| 54922          | RASIP1           | 148         | 0.00082         |
| 22903          | BTBD3            | 149         | 0.00082         |
| 10320          | IKZF1            | 150         | 0.00082         |
| 9404           | LPXN             | 151         | 0.00082         |
| 4858           | NOVA2            | 152         | 0.00081         |
| 25780          | RASGRP3          | 153         | 0.00081         |
| 375033         | PEAR1            | 154         | 0.00081         |
| 3339           | HSPG2            | 155         | 0.00081         |
| 51225          | ABI3             | 156         | 0.00081         |
| 5551           | PRF1             | 157         | 0.00081         |
| 10044          | SH2D3C           | 158         | 0.00081         |
| 962            | CD48             | 159         | 0.00079         |
| 64333          | ARHGAP9          | 160         | 0.00079         |
| 653361         | NCF1             | 161         | 0.00079         |
| 915            | CD3D             | 162         | 0.00079         |
| 55303          | GIMAP4           | 163         | 0.00079         |
| 79413          | ZBED2            | 164         | 0.00079         |
| 639            | PRDM1            | 165         | 0.00078         |
| 1521           | CTSW             | 166         | 0.00078         |
| 83878          | USHBP1           | 167         | 0.00078         |
| 85461          | TANC1            | 168         | 0.00077         |
| 64919          | BCL11B           | 169         | 0.00077         |
| 64218          | SEMA4A           | 170         | 0.00077         |



| Entrez Gene ID | HUGO Gene Symbol | Global Rank | Featured Weight |
|----------------|------------------|-------------|-----------------|
| 3587           | IL10RA           | 171         | 0.00077         |
| 4005           | LMO2             | 172         | 0.00077         |
| 22918          | CD93             | 173         | 0.00077         |
| 54682          | MANSC1           | 174         | 0.00076         |
| 2013           | EMP2             | 175         | 0.00076         |
| 64321          | SOX17            | 176         | 0.00076         |
| 79652          | TMEM204          | 177         | 0.00075         |
| 5699           | PSMB10           | 178         | 0.00075         |
| 2022           | ENG              | 179         | 0.00074         |
| 3430           | IFI35            | 180         | 0.00074         |
| 84230          | LRRC8C           | 181         | 0.00074         |
| 83700          | JAM3             | 182         | 0.00073         |
| 3714           | JAG2             | 183         | 0.00073         |
| 752            | FMNL1            | 184         | 0.00073         |
| 50619          | DEF6             | 185         | 0.00073         |
| 200734         | SPRED2           | 186         | 0.00073         |
| 60489          | APOBEC3G         | 187         | 0.00073         |
| 126326         | GIPC3            | 188         | 0.00073         |
| 9710           | KIAA0355         | 189         | 0.00073         |
| 55340          | GIMAP5           | 190         | 0.00073         |
| 7402           | UTRN             | 191         | 0.00073         |
| 474344         | GIMAP6           | 192         | 0.00072         |
| 5583           | PRKCH            | 193         | 0.00072         |
| 8477           | GPR65            | 194         | 0.00072         |
| 23348          | DOCK9            | 195         | 0.00072         |
| 23129          | PLXND1           | 196         | 0.00072         |
| 8404           | SPARCL1          | 197         | 0.00072         |
| 51676          | ASB2             | 198         | 0.00071         |
| 10385          | BTN2A2           | 199         | 0.00071         |
| 257106         | ARHGAP30         | 200         | 0.00071         |
| 10384          | BTN3A3           | 201         | 0.00071         |
| 5696           | PSMB8            | 202         | 0.00071         |
| 4430           | MYO1B            | 203         | 0.00071         |
| 3936           | LCP1             | 204         | 0.00071         |
| 64127          | NOD2             | 205         | 0.00071         |
| 83439          | TCF7L1           | 206         | 0.0007          |
| 2869           | GRK5             | 207         | 0.0007          |
| 79961          | DENND2D          | 208         | 0.0007          |
| 3113           | HLA-DPA1         | 209         | 0.0007          |
| 131450         | CD200R1          | 210         | 0.0007          |
| 54861          | SNRK             | 211         | 0.00069         |
| 3106           | HLA-B            | 212         | 0.00068         |
| 5155           | PDGFB            | 213         | 0.00068         |

| Entrez Gene ID | HUGO Gene Symbol | Global Rank | Featured Weight |
|----------------|------------------|-------------|-----------------|
| 2899           | GRIK3            | 214         | 0.00068         |
| 6497           | SKI              | 215         | 0.00068         |
| 54567          | DLL4             | 216         | 0.00067         |
| 7010           | TEK              | 217         | 0.00067         |
| 10395          | DLC1             | 218         | 0.00067         |
| 10866          | HCP5             | 219         | 0.00067         |
| 134265         | AFAP1L1          | 220         | 0.00066         |
| 167465         | ZNF366           | 221         | 0.00066         |
| 10663          | CXCR6            | 222         | 0.00066         |
| 8578           | SCARF1           | 223         | 0.00066         |
| 51744          | CD244            | 224         | 0.00066         |
| 3627           | CXCL10           | 225         | 0.00065         |
| 255877         | BCL6B            | 226         | 0.00065         |
| 3707           | ITPKB            | 227         | 0.00065         |
| 3133           | HLA-E            | 228         | 0.00065         |
| 11119          | BTN3A1           | 229         | 0.00065         |
| 126375         | ZNF792           | 230         | 0.00064         |
| 3384           | ICAM2            | 231         | 0.00064         |
| 146206         | RLTPR            | 232         | 0.00064         |
| 57477          | SHROOM4          | 233         | 0.00064         |
| 6846           | XCL2             | 234         | 0.00064         |
| 130132         | RFTN2            | 235         | 0.00064         |
| 3122           | HLA-DRA          | 236         | 0.00063         |
| 6935           | ZEB1             | 237         | 0.00063         |
| 10870          | HCST             | 238         | 0.00063         |
| 2533           | FYB              | 239         | 0.00063         |
| 57568          | SIPA1L2          | 240         | 0.00063         |
| 27115          | PDE7B            | 241         | 0.00062         |
| 55534          | MAML3            | 242         | 0.00062         |
| 169611         | OLFML2A          | 243         | 0.00062         |
| 164668         | APOBEC3H         | 244         | 0.00062         |
| 9046           | DOK2             | 245         | 0.00062         |
| 3603           | IL16             | 246         | 0.00062         |
| 2643           | GCH1             | 247         | 0.00061         |
| 1948           | EFNB2            | 248         | 0.00061         |
| 83857          | TMTC1            | 249         | 0.00061         |
| 152273         | FGD5             | 250         | 0.00061         |
| 83872          | HMCN1            | 251         | 0.0006          |
| 22806          | IKZF3            | 252         | 0.0006          |
| 6753           | SSTR3            | 253         | 0.0006          |
| 79905          | TMC7             | 254         | 0.0006          |
| 9771           | RAPGEF5          | 255         | 0.0006          |
| 23046          | KIF21B           | 256         | 0.0006          |

| Entrez Gene ID | HUGO Gene Symbol | Global Rank | Featured Weight |
|----------------|------------------|-------------|-----------------|
| 2697           | GJA1             | 257         | 0.00059         |
| 51291          | GMIP             | 258         | 0.00059         |
| 2313           | FLI1             | 259         | 0.00059         |
| 4947           | OAZ2             | 260         | 0.00059         |
| 5362           | PLXNA2           | 261         | 0.00059         |
| 286530         | P2RY8            | 262         | 0.00059         |
| 26191          | PTPN22           | 263         | 0.00059         |
| 1910           | EDNRB            | 264         | 0.00059         |
| 29941          | PKN3             | 265         | 0.00058         |
| 256435         | ST6GALNAC3       | 266         | 0.00058         |
| 80774          | LIMD2            | 267         | 0.00058         |
| 151888         | BTLA             | 268         | 0.00058         |
| 30009          | TBX21            | 269         | 0.00058         |
| 5420           | PODXL            | 270         | 0.00058         |
| 6772           | STAT1            | 271         | 0.00058         |
| 83706          | FERMT3           | 272         | 0.00057         |
| 2004           | ELK3             | 273         | 0.00057         |
| 135            | ADORA2A          | 274         | 0.00056         |
| 9223           | MAGI1            | 275         | 0.00056         |
| 80833          | APOL3            | 276         | 0.00056         |
| 10008          | KCNE3            | 277         | 0.00056         |
| 1846           | DUSP4            | 278         | 0.00056         |
| 147138         | TMC8             | 279         | 0.00055         |
| 2934           | GSN              | 280         | 0.00055         |
| 5367           | PMCH             | 281         | 0.00055         |
| 4046           | LSP1             | 282         | 0.00055         |
| 497189         | TIFAB            | 283         | 0.00054         |
| 23075          | SWAP70           | 284         | 0.00054         |
| 25927          | CNRIP1           | 285         | 0.00054         |
| 2634           | GBP2             | 286         | 0.00054         |
| 10068          | IL18BP           | 287         | 0.00053         |
| 51816          | CECR1            | 288         | 0.00053         |
| 23225          | NUP210           | 289         | 0.00053         |
| 80709          | AKNA             | 290         | 0.00053         |
| 6405           | SEMA3F           | 291         | 0.00053         |
| 3937           | LCP2             | 292         | 0.00053         |
| 5787           | PTPRB            | 293         | 0.00053         |
| 225            | ABCD2            | 294         | 0.00053         |
| 5777           | PTPN6            | 295         | 0.00053         |
| 9537           | TP53I11          | 296         | 0.00052         |
| 149699         | GTSF1L           | 297         | 0.00052         |
| 4208           | MEF2C            | 298         | 0.00052         |
| 8642           | DCHS1            | 299         | 0.00052         |

| Entrez Gene ID | HUGO Gene Symbol | Global Rank | Featured Weight |
|----------------|------------------|-------------|-----------------|
| 3672           | ITGA1            | 300         | 0.00052         |
| 156            | ADRBK1           | 301         | 0.00052         |
| 5920           | RARRES3          | 302         | 0.00051         |
| 55013          | CCDC109B         | 303         | 0.00051         |
| 257068         | PLCXD2           | 304         | 0.00051         |
| 8503           | PIK3R3           | 305         | 0.00051         |
| 27253          | PCDH17           | 306         | 0.00051         |
| 8692           | HYAL2            | 307         | 0.00051         |
| 10538          | BATF             | 308         | 0.00051         |
| 114769         | CARD16           | 309         | 0.00051         |
| 92241          | RCSD1            | 310         | 0.0005          |
| 3563           | IL3RA            | 311         | 0.0005          |
| 57088          | PLSCR4           | 312         | 0.0005          |
| 7126           | TNFAIP1          | 313         | 0.00049         |
| 387357         | THEMIS           | 314         | 0.00049         |
| 2701           | GJA4             | 315         | 0.00049         |
| 80308          | FLAD1            | 316         | 0.00049         |
| 256949         | KANK3            | 317         | 0.00049         |
| 4261           | CIITA            | 318         | 0.00049         |
| 2563           | GABRD            | 319         | 0.00049         |
| 10537          | UBD              | 320         | 0.00048         |
| 6351           | CCL4             | 321         | 0.00048         |
| 10052          | GJC1             | 322         | 0.00048         |
| 4851           | NOTCH1           | 323         | 0.00048         |
| 23157          | 43714            | 324         | 0.00048         |
| 1849           | DUSP7            | 325         | 0.00048         |
| 26207          | PITPNC1          | 326         | 0.00048         |
| 57381          | RHOJ             | 327         | 0.00048         |
| 3695           | ITGB7            | 328         | 0.00048         |
| 160365         | CLECL1           | 329         | 0.00048         |
| 23328          | SASH1            | 330         | 0.00048         |
| 3105           | HLA-A            | 331         | 0.00048         |
| 4162           | MCAM             | 332         | 0.00048         |
| 5880           | RAC2             | 333         | 0.00047         |
| 84225          | ZMYND15          | 334         | 0.00047         |
| 221184         | CPNE2            | 335         | 0.00047         |
| 3136           | HLA-H            | 336         | 0.00047         |
| 2              | A2M              | 337         | 0.00047         |
| 11170          | FAM107A          | 338         | 0.00047         |
| 2887           | GRB10            | 339         | 0.00047         |
| 8611           | PPAP2A           | 340         | 0.00047         |
| 9647           | PPM1F            | 341         | 0.00047         |
| 3107           | HLA-C            | 342         | 0.00047         |

| Entrez Gene ID | HUGO Gene Symbol | Global Rank | Featured Weight |
|----------------|------------------|-------------|-----------------|
| 114800         | CCDC85A          | 343         | 0.00047         |
| 10906          | TRAFD1           | 344         | 0.00047         |
| 56548          | CHST7            | 345         | 0.00047         |
| 126669         | SHE              | 346         | 0.00047         |
| 11082          | ESM1             | 347         | 0.00046         |
| 90332          | EXOC3L2          | 348         | 0.00046         |
| 196883         | ADCY4            | 349         | 0.00046         |
| 7881           | KCNAB1           | 350         | 0.00046         |
| 27145          | FILIP1           | 351         | 0.00046         |
| 11118          | BTN3A2           | 352         | 0.00046         |
| 23526          | HMHA1            | 353         | 0.00046         |
| 140564         | APOBEC3D         | 354         | 0.00046         |
| 84969          | TOX2             | 355         | 0.00046         |
| 115352         | FCRL3            | 356         | 0.00045         |
| 143903         | LAYN             | 357         | 0.00045         |
| 5993           | RFX5             | 358         | 0.00045         |
| 9749           | PHACTR2          | 359         | 0.00045         |
| 9246           | UBE2L6           | 360         | 0.00045         |
| 1879           | EBF1             | 361         | 0.00045         |
| 117248         | GALNTL2          | 362         | 0.00045         |
| 80342          | TRAF3IP3         | 363         | 0.00045         |
| 3662           | IRF4             | 364         | 0.00044         |
| 55901          | THSD1            | 365         | 0.00044         |
| 10563          | CXCL13           | 366         | 0.00044         |
| 140685         | ZBTB46           | 367         | 0.00044         |
| 57153          | SLC44A2          | 368         | 0.00044         |
| 4542           | MYO1F            | 369         | 0.00044         |
| 64926          | RASAL3           | 370         | 0.00044         |
| 54438          | GFOD1            | 371         | 0.00044         |
| 90627          | STARD13          | 372         | 0.00043         |
| 5476           | CTSA             | 373         | 0.00043         |
| 9351           | SLC9A3R2         | 374         | 0.00043         |
| 114614         | MIR155HG         | 375         | 0.00043         |
| 2050           | EPHB4            | 376         | 0.00043         |
| 26157          | GIMAP2           | 377         | 0.00043         |
| 8490           | RGS5             | 378         | 0.00043         |
| 6737           | TRIM21           | 379         | 0.00043         |
| 6688           | SPI1             | 380         | 0.00043         |
| 654817         | NCF1C            | 381         | 0.00043         |
| 51379          | CRLF3            | 382         | 0.00043         |
| 9891           | NUAK1            | 383         | 0.00043         |
| 10203          | CALCRL           | 384         | 0.00042         |
| 1906           | EDN1             | 385         | 0.00042         |

| Entrez Gene ID | HUGO Gene Symbol | Global Rank | Featured Weight |
|----------------|------------------|-------------|-----------------|
| 9411           | ARHGAP29         | 386         | 0.00042         |
| 2207           | FCER1G           | 387         | 0.00042         |
| 22807          | IKZF2            | 388         | 0.00042         |
| 6297           | SALL2            | 389         | 0.00042         |
| 10763          | NES              | 390         | 0.00042         |
| 8829           | NRP1             | 391         | 0.00042         |
| 9580           | SOX13            | 392         | 0.00042         |
| 441478         | NRARP            | 393         | 0.00041         |
| 3092           | HIP1             | 394         | 0.00041         |
| 7082           | TJP1             | 395         | 0.00041         |
| 51021          | MRPS16           | 396         | 0.00041         |
| 3116           | HLA-DPB2         | 397         | 0.00041         |
| 4811           | NID1             | 398         | 0.00041         |
| 256364         | EML3             | 399         | 0.00041         |
| 3109           | HLA-DMB          | 400         | 0.00041         |
| 387923         | SERP2            | 401         | 0.00041         |
| 153579         | BTNL9            | 402         | 0.00041         |
| 51056          | LAP3             | 403         | 0.00041         |
| 963            | CD53             | 404         | 0.00041         |
| 197358         | NLRC3            | 405         | 0.00041         |
| 2124           | EVI2B            | 406         | 0.00041         |
| 23263          | MCF2L            | 407         | 0.0004          |
| 9828           | ARHGEF17         | 408         | 0.0004          |
| 54847          | SIDT1            | 409         | 0.0004          |
| 10268          | RAMP3            | 410         | 0.0004          |
| 81848          | SPRY4            | 411         | 0.0004          |
| 7185           | TRAF1            | 412         | 0.0004          |
| 25960          | GPR124           | 413         | 0.0004          |
| 924            | CD7              | 414         | 0.00039         |
| 3720           | JARID2           | 415         | 0.00039         |
| 342926         | ZNF677           | 416         | 0.00039         |
| 8291           | DYSF             | 417         | 0.00039         |
| 482            | ATP1B2           | 418         | 0.00039         |
| 4846           | NOS3             | 419         | 0.00039         |
| 3340           | NDST1            | 420         | 0.00039         |
| 27040          | LAT              | 421         | 0.00039         |
| 8111           | GPR68            | 422         | 0.00039         |
| 5293           | PIK3CD           | 423         | 0.00038         |
| 1464           | CSPG4            | 424         | 0.00038         |
| 26262          | TSPAN17          | 425         | 0.00038         |
| 5939           | RBMS2            | 426         | 0.00038         |
| 864            | RUNX3            | 427         | 0.00038         |
| 64222          | TOR3A            | 428         | 0.00038         |

| Entrez Gene ID | HUGO Gene Symbol | Global Rank | Featured Weight |
|----------------|------------------|-------------|-----------------|
| 11015          | KDELR3           | 429         | 0.00038         |
| 3139           | HLA-L            | 430         | 0.00038         |
| 81619          | TSPAN14          | 431         | 0.00038         |
| 430            | ASCL2            | 432         | 0.00038         |
| 5579           | PRKCB            | 433         | 0.00037         |
| 4772           | NFATC1           | 434         | 0.00037         |
| 221395         | GPR116           | 435         | 0.00037         |
| 222553         | SLC35F1          | 436         | 0.00037         |
| 254263         | CNIH2            | 437         | 0.00037         |
| 83595          | SOX7             | 438         | 0.00037         |
| 606724         | LOC606724        | 439         | 0.00037         |
| 23616          | SH3BP1           | 440         | 0.00037         |
| 51177          | PLEKHO1          | 441         | 0.00037         |
| 81575          | APOLD1           | 442         | 0.00037         |
| 51313          | FAM198B          | 443         | 0.00036         |
| 79626          | TNFAIP8L2        | 444         | 0.00036         |
| 57480          | PLEKHG1          | 445         | 0.00036         |
| 6892           | TAPBP            | 446         | 0.00036         |
| 201294         | UNC13D           | 447         | 0.00036         |
| 6525           | SMTN             | 448         | 0.00036         |
| 28951          | TRIB2            | 449         | 0.00036         |
| 54331          | GNG2             | 450         | 0.00036         |
| 2624           | GATA2            | 451         | 0.00036         |
| 51296          | SLC15A3          | 452         | 0.00036         |
| 445815         | PALM2-AKAP2      | 453         | 0.00035         |
| 441027         | TMEM150C         | 454         | 0.00035         |
| 260293         | CYP4X1           | 455         | 0.00035         |
| 10379          | IRF9             | 456         | 0.00035         |
| 57620          | STIM2            | 457         | 0.00035         |
| 79843          | FAM124B          | 458         | 0.00035         |
| 168537         | GIMAP7           | 459         | 0.00035         |
| 9467           | SH3BP5           | 460         | 0.00035         |
| 57496          | MKL2             | 461         | 0.00035         |
| 7535           | ZAP70            | 462         | 0.00035         |
| 6915           | TBXA2R           | 463         | 0.00035         |
| 3632           | INPP5A           | 464         | 0.00034         |

| Entrez Gene ID | HUGO Gene Symbol | Global Rank | Featured Weight |
|----------------|------------------|-------------|-----------------|
| 5937           | RBMS1            | 465         | 0.00034         |
| 3115           | HLA-DPB1         | 466         | 0.00034         |
| 923            | CD6              | 467         | 0.00034         |
| 50943          | FOXP3            | 468         | 0.00034         |
| 23637          | RABGAP1          | 469         | 0.00034         |
| 283420         | CLEC9A           | 470         | 0.00034         |
| 7092           | TLL1             | 471         | 0.00034         |
| 219285         | SAMD9L           | 472         | 0.00034         |
| 10420          | TESK2            | 473         | 0.00034         |
| 9997           | SCO2             | 474         | 0.00034         |
| 11098          | PRSS23           | 475         | 0.00034         |
| 7102           | TSPAN7           | 476         | 0.00033         |
| 26524          | LATS2            | 477         | 0.00033         |
| 7456           | WIPF1            | 478         | 0.00033         |
| 6867           | TACC1            | 479         | 0.00033         |
| 30844          | EHD4             | 480         | 0.00033         |
| 5168           | ENPP2            | 481         | 0.00033         |
| 23462          | HEY1             | 482         | 0.00033         |
| 912            | CD1D             | 483         | 0.00033         |
| 165186         | FAM179A          | 484         | 0.00033         |
| 132160         | PPM1M            | 485         | 0.00033         |
| 3135           | HLA-G            | 486         | 0.00033         |
| 23214          | XPO6             | 487         | 0.00033         |
| 10105          | PPIF             | 488         | 0.00033         |
| 10194          | TSHZ1            | 489         | 0.00033         |
| 971            | CD72             | 490         | 0.00033         |
| 54900          | LAX1             | 491         | 0.00033         |
| 2185           | PTK2B            | 492         | 0.00033         |
| 6345           | SRL              | 493         | 0.00032         |
| 158376         | LOC158376        | 494         | 0.00032         |
| 9217           | VAPB             | 495         | 0.00032         |
| 801            | CALM1            | 496         | 0.00032         |
| 4804           | NGFR             | 497         | 0.00032         |
| 10039          | PARP3            | 498         | 0.00032         |
| 6793           | STK10            | 499         | 0.00032         |
| 285            | ANGPT2           | 500         | 0.00032         |

**Supplementary Table ST2:** The genes selected for our 66-gene signature and their sources.

| 66-gene signature | Rank | Source      |
|-------------------|------|-------------|
| ANGPT4            | NA   | IMmotion150 |
| EDN1              | 385  |             |
| VEGFA             | NA   | IMmotion150 |
| ESM1              | 347  |             |
| FLT1              | 75   |             |
| KDR               | 146  |             |
| CD34              | 18   |             |
| PECAM1            | 117  |             |
| NOTCH1            | 323  |             |
| EDNRB             | 264  |             |
| STIM2             | 457  |             |
| FYN               | 61   |             |
| VWF               | 101  |             |
| GJA1              | 257  |             |
| MCF2L             | 407  |             |
| PPM1F             | 314  |             |
| PTPRB             | 293  |             |
| HEY1              | 482  |             |
| ETS1              | 69   |             |
| EXOC3L2           | 348  |             |
| TBXA2R            | 463  |             |
| TCF4              | 96   |             |
| S1PR1             | 137  |             |
| SLC9A3R2          | 374  |             |
| NES               | 390  |             |
| NFATC1            | 434  |             |
| NOS3              | 419  |             |
| PDE2A             | 107  |             |
| CORO1A            | 54   |             |
| CCR5              | 29   |             |
| CXCR3             | 30   |             |
| PTK2B             | 492  |             |
| WAS               | 70   |             |

| 66-gene signature | Rank | Source                                |
|-------------------|------|---------------------------------------|
| CD72              | 490  |                                       |
| IL16              | 246  |                                       |
| FYB1              | NA   | IPA: Cell Movement network (Invasion) |
| FASLG             | 40   |                                       |
| FERMT3            | 272  |                                       |
| FOXP3             | 468  |                                       |
| XCL2              | 234  |                                       |
| CD3E              | 10   |                                       |
| CD7               | 414  |                                       |
| LAX1              | 491  |                                       |
| CD38              | 97   |                                       |
| LCP1              | 204  |                                       |
| LCP2              | 292  |                                       |
| ITK               | 36   |                                       |
| LAT               | 421  |                                       |
| LCK               | 9    |                                       |
| GRK2              | NA   | IPA: Ca <sup>2+</sup> flux network    |
| CCL4              | 321  |                                       |
| CCL5              | 85   |                                       |
| CD2               | 3    |                                       |
| PRF1              | 157  |                                       |
| TIGIT             | 8    |                                       |
| GZMA              | 87   |                                       |
| GZMB              | NA   | IMmotion150                           |
| CD8A              | 5    |                                       |
| CTLA4             | 108  |                                       |
| EOMES             | 102  |                                       |
| PDCD1             | 71   |                                       |
| PYHIN1            | 1    |                                       |
| SLA2              | 2    |                                       |
| LTA               | 4    |                                       |
| PSMB8             | 202  |                                       |
| PSMB9             | 26   |                                       |

**Supplementary Table ST3:** Association of gene mutation with Immotion150 patient clusters.

| IMmotion150 32-gene signature | Mutated gene | Cluster | p-value    | Bonferroni corrected p-value | Mutated, Cluster | Not mutated, Cluster | Mutated, Non-Cluster | Not mutated, Non-Cluster |
|-------------------------------|--------------|---------|------------|------------------------------|------------------|----------------------|----------------------|--------------------------|
|                               | VHL          | ANGIO   | 0.1592     | 1                            | 93               | 79                   | 117                  | 134                      |
|                               | VHL          | TEFF    | 0.0446     | 0.7136                       | 87               | 110                  | 123                  | 103                      |
|                               | VHL          | MYE     | 0.43285    | 1                            | 30               | 24                   | 180                  | 189                      |
|                               | TP53         | ANGIO   | 0.01347    | 0.21552                      | 0                | 172                  | 11                   | 240                      |
|                               | TP53         | TEFF    | 0.00734    | 0.11744                      | 10               | 187                  | 1                    | 225                      |
|                               | TP53         | MYE     | 1          | 1                            | 1                | 53                   | 10                   | 359                      |
|                               | BAP1         | ANGIO   | 0.00137    | 0.0218464                    | 6                | 166                  | 33                   | 218                      |
|                               | BAP1         | TEFF    | 3.2E-05    | 0.00051699                   | 31               | 166                  | 8                    | 218                      |
|                               | BAP1         | MYE     | 0.21191    | 1                            | 2                | 52                   | 37                   | 332                      |
|                               | SETD2        | ANGIO   | 1          | 1                            | 20               | 152                  | 28                   | 223                      |
|                               | SETD2        | TEFF    | 1          | 1                            | 22               | 175                  | 26                   | 200                      |
|                               | SETD2        | MYE     | 1          | 1                            | 6                | 48                   | 42                   | 327                      |
|                               | PBRM1        | ANGIO   | 0.00122    | 0.0194672                    | 68               | 104                  | 61                   | 190                      |
| PBRM1                         | TEFF         | 8.4E-05 | 0.00134075 | 41                           | 156              | 88                   | 138                  |                          |
| PBRM1                         | MYE          | 0.3373  | 1          | 20                           | 34               | 109                  | 260                  |                          |

**Supplementary Table ST4:** Association of gene mutation with 66-gene signature patient clusters.

| Refined 66-gene signature | Mutated gene | Cluster | p-value | Bonferroni corrected p-value | Mutated, Cluster | Not mutated, Cluster | Mutated, Non-Cluster | Not mutated, Non-Cluster |
|---------------------------|--------------|---------|---------|------------------------------|------------------|----------------------|----------------------|--------------------------|
|                           | VHL          | TEFF    | 0.00555 | 0.088752                     | 97               | 127                  | 114                  | 85                       |
|                           | VHL          | ANGIO   | 0.0341  | 0.54552                      | 97               | 75                   | 114                  | 137                      |
|                           | VHL          | MIX     | 0.22777 | 1                            | 17               | 10                   | 194                  | 202                      |
|                           | TP53         | TEFF    | 0.00422 | 0.06746624                   | 11               | 213                  | 0                    | 199                      |
|                           | TP53         | ANGIO   | 0.01348 | 0.2156112                    | 0                | 172                  | 11                   | 240                      |
|                           | TP53         | MIX     | 0.80056 | 1                            | 0                | 27                   | 11                   | 385                      |
|                           | BAP1         | TEFF    | 0.00823 | 0.13172304                   | 29               | 216                  | 10                   | 189                      |
|                           | BAP1         | ANGIO   | 0.0001  | 0.00162955                   | 4                | 168                  | 35                   | 216                      |
|                           | BAP1         | MIX     | 0.03847 | 0.61544                      | 6                | 21                   | 33                   | 363                      |
|                           | SETD2        | TEFF    | 0.55572 | 1                            | 23               | 201                  | 25                   | 174                      |
|                           | SETD2        | ANGIO   | 0.75077 | 1                            | 18               | 154                  | 30                   | 221                      |
|                           | SETD2        | MIX     | 0.03117 | 0.4987616                    | 7                | 20                   | 41                   | 355                      |
|                           | PBRM1        | TEFF    | 0.00347 | 0.0555616                    | 54               | 170                  | 75                   | 124                      |
|                           | PBRM1        | ANGIO   | 0.00503 | 0.080524                     | 66               | 106                  | 63                   | 188                      |
| PBRM1                     | MIX          | 0.90852 | 1       | 9                            | 18               | 120                  | 276                  |                          |

**Supplementary Table ST5:** Patients classification pattern between the proposed 66-gene signature and IMmotion150 gene signature.

| Matched classification of patients |     |      |
|------------------------------------|-----|------|
| Groups                             | n   | %    |
| Angiogenic                         | 124 | 26.4 |
| T-effector                         | 195 | 41.6 |
| Total                              | 319 | 68.0 |

| Re-classified patients |                    |     |      |
|------------------------|--------------------|-----|------|
| 66-gene Groups         | IMmotion150 Groups | n   | %    |
| Angiogenic             | T-effector         | 9   | 1.9  |
| T-effector             | Angiogenic         | 18  | 3.8  |
| Mixed                  | Angiogenic         | 50  | 10.7 |
| Mixed                  | T-effector         | 18  | 3.8  |
| Mixed                  | Myeloid            | 14  | 3.0  |
| Angiogenic             | Myeloid            | 29  | 6.2  |
| T-effector             | Myeloid            | 12  | 2.6  |
| Total                  |                    | 150 | 32.0 |



**Supplementary Table ST6:** Cox regression analysis of disease free survival time using the proposed 66-gene signature and IMmotion150 32-gene signature.

| <b>Refined 66-gene signature, n= 378</b> |       |               |           |       |         |
|------------------------------------------|-------|---------------|-----------|-------|---------|
|                                          | coef  | exp<br>(coef) | se (coef) | z     | p-value |
| <i>Compared to Angio</i>                 |       |               |           |       |         |
| Mixed                                    | 0.556 | 1.743         | 0.269     | 2.068 | *0.039  |
| T-eff                                    | 0.793 | 2.209         | 0.341     | 2.325 | *0.020  |
| Likelihood ratio test                    |       |               |           |       | 0.100   |
| Wald test                                |       |               |           |       | 0.100   |
| Score (logrank)                          |       |               |           |       | 0.100   |

| <b>IMmotion150 32-gene signature, n=378</b> |            |               |           |        |         |
|---------------------------------------------|------------|---------------|-----------|--------|---------|
|                                             | coef       | exp<br>(coef) | se (coef) | z      | p-value |
| <i>Compared to Angio</i>                    |            |               |           |        |         |
| Myeloid                                     | -<br>0.429 | 0.651         | 0.334     | -1.286 | 0.199   |
| T-eff                                       | -<br>0.509 | 0.601         | 0.326     | -1.560 | 0.119   |
| Likelihood ratio test                       |            |               |           |        | 0.700   |
| Wald test                                   |            |               |           |        | 0.700   |
| Score (logrank)                             |            |               |           |        | 0.700   |
